# Supplementary material for: Facile carbohydrate-based stereocontrolled divergent synthesis of (+)-pericosines A and B
Source: Royal Society of Chemistry journal article supplement (doi:10.1039/c1ob06383a), 2011-01-01

# *Supporting Information*

## **Facile carbohydrate-based stereocontrolled divergent synthesis of (+)-pericosines A and B**

**Subhankar Tripathi, Ajam Chand Shaikh and Chinpiao Chen\***

*Department of Chemistry, National Dong Hwa University, Hualien 97401 Taiwan,*

*ROC.*

E-mail: *chinpiao@mail.ndhu.edu.tw*

## Index

| <b>Contents of Supporting Information</b>                                              | <b>page</b> | <b>#</b> |
|----------------------------------------------------------------------------------------|-------------|----------|
| Contents of Supporting Information                                                     |             | S2       |
| General Experimental Protocols                                                         |             | S3       |
| Procedures for preparation and characterization data for intermediates in Pericosine A |             | 3S-7S    |
| Procedures for preparation and characterization data for intermediates in Pericosine B |             | 8S-9S    |
| <b>NMR SPECTRA</b>                                                                     |             |          |
| Copies of $^1\text{H}$ and $^{13}\text{C}$ NMR spectra of compound <b>11</b>           |             | S10-11   |
| Copies of $^1\text{H}$ and $^{13}\text{C}$ NMR spectra of compound <b>8</b>            |             | S12-13   |
| Copies of $^1\text{H}$ and $^{13}\text{C}$ NMR spectra of compound <b>14</b>           |             | S14-15   |
| Copies of $^1\text{H}$ and $^{13}\text{C}$ NMR spectra of compound <b>10</b>           |             | S16-17   |
| Copies of $^1\text{H}$ and $^{13}\text{C}$ NMR spectra of compound <b>1</b>            |             | S18-19   |
| Copies of $^1\text{H}$ and $^{13}\text{C}$ NMR spectra of compound <b>13</b>           |             | S20-21   |
| Copies of $^1\text{H}$ and $^{13}\text{C}$ NMR spectra of compound <b>9</b>            |             | S22-23   |
| Copies of $^1\text{H}$ and $^{13}\text{C}$ NMR spectra of compound <b>2</b>            |             | S24-25   |

## Experimental Section

### General:

All melting points are uncorrected. All reactions were carried out in anhydrous solvents unless specified. THF and diethyl ether were distilled from sodium-benzophenone under argon. DCM and hexanes were distilled from CaH<sub>2</sub>. <sup>1</sup>H NMR spectra were obtained at 300 or 400 MHz (as indicated). <sup>13</sup>C NMR spectra were obtained at 75.5 or 100.6 MHz, using a Bruker NMR spectrometer. Chemical shifts ( $\delta$ ) are reported in *ppm* relative to CDCl<sub>3</sub> (7.26 and 77.0 ppm). Mass spectra (EI-MS) and high resolution mass spectra (HRMS) were determined on a Finnigan/Thermo Quest MAT 95XL mass spectrometer. Infrared spectra were recorded using a JASCO FT/IR 410 spectrometer. Flash Column chromatography was performed using MN silica gel 60 (70–230 mesh) purchased from Macherey-Nagel.

### Synthesis of Pericosine A

#### (*R*)-2-(methoxymethoxy)-2-((2*S*,3*S*)-3-vinyl-1,4-dioxaspiro[4.5]decan-2-yl)ethanol **11**

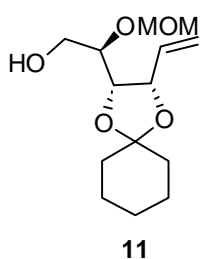

A solution of diol **6** (2.84 g, 12.46 mmol) in dry DCM was cooled to 0 °C, then to it imidazole (1.86 gm, 27.46 mmol) was added and stirred for 30 min at the same temperature, after which TBSCl (2.81 gm, 18.70 mmol) was added. The reaction mixture was stirred for 1 h at 0 °C and quenched by adding water to it. Extraction was done by DCM; combined organic layer was dried over anhydrous Na<sub>2</sub>SO<sub>4</sub>. Organic

solvent was evaporated under reduced pressure to afford crude product which was used for the next reaction without purification.

To a solution of TBS ether (300 mg, 0.87 mmol) in dry DCM (10 mL) was added Hunig's base (381  $\mu$ L, 2.18 mmol) and MOMBr (143  $\mu$ L, 1.75 mmol), the resulting mixture was refluxed for 24 h. Reaction was cooled to rt and quenched by adding water to it. Extraction was done by DCM, combined organic layer was dried over anhydrous Na<sub>2</sub>SO<sub>4</sub> and concentrated to obtain crude product which was used for next reaction without further purification.

The THF (10 mL) solution of MOM ether was added TBAF (1 M solution in THF, 2 mL). The reaction mixture was stirred for 45 min at rt and quenched by adding saturated

aqueous solution of NaHCO<sub>3</sub>. Extraction was done by DCM, dried over anhydrous MgSO<sub>4</sub>, and combined organic layer was evaporated under reduced pressure to give crude product which was purified by column chromatography [SiO<sub>2</sub>, ethyl acetate-hexanes (1:5)] to furnish alcohol **11** (215 mg, 0.87 mmol, 91%) as gum. [ $\alpha$ ]<sub>D</sub><sup>24.2</sup> +61.8 (*c* 0.17, CHCl<sub>3</sub>). <sup>1</sup>H NMR (400 MHz, CDCl<sub>3</sub>)  $\delta$  5.81 (m, 1H), 5.31 (d, *J* = 17.1 Hz, 1H), 5.15 (d, *J* = 10.5 Hz, 1H), 4.57 (m, 3H), 4.06 (m, 1H), 3.80 (d, *J* = 12.1 Hz, 1H), 3.58 (m, 1H), 3.47 (m, 1H), 3.35 (s, 3H), 1.55 (m, 8H), 1.32 (m, 2H). <sup>13</sup>C NMR (100.6 MHz, CDCl<sub>3</sub>)  $\delta$  134.0, 117.3, 109.3, 97.5, 81.1, 78.2, 76.5, 63.8, 55.8, 37.5, 34.7, 25.0, 23.9, 23.6. IR (neat)  $\nu_{\max}$  3461, 2934, 2857, 1448, 1366, 1108, 1034, 927, 847 cm<sup>-1</sup>. MS-EI (*m/z*) 272 (M<sup>+</sup>, 10), 167 (56), 138 (42), 125 (59), 81 (56), 55 (100). HRMS-EI (*m/z*) [M]<sup>+</sup> calcd. for C<sub>14</sub>H<sub>24</sub>O<sub>5</sub>, 272.1624; found 272.1627.

**(3*R*,4*R*)-methyl 3-hydroxy-4-(methoxymethoxy)-2-methylene-4-((2*S*,3*S*)-3-vinyl-1,4-dioxaspiro[4.5]decan-2-yl)butanoate **8****

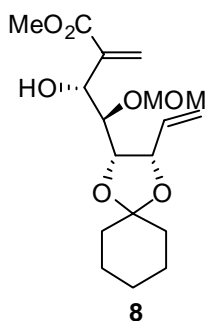

**Preparation of aldehyde 7:** A solution of DCM (30 mL) and oxalyl chloride (634  $\mu$ L, 7.34 mmol) was placed under inert atmosphere and DMSO (1.04 mL, 14.68 mmol) in DCM (5 mL) was added at -78 °C. The reaction mixture was stirred for 15 min at the same temperature and alcohol (1.00 g, 3.67 mmol) was added within 5 min. Stirring was continued for an additional 40 min and then triethyl amine (5.11 mL, 36.72 mmol) was added. The reaction mixture was warmed to rt and

additionally stirred overnight. Water (50 mL) was added to it, aqueous layer was separated and extracted with fresh portion of DCM and combined organic layer was dried over anhydrous Na<sub>2</sub>SO<sub>4</sub> and concentrated to get crude aldehyde **7**, which was used for next reaction without further purification.

**Preparation of Iodoacrylate-** The mixture of I<sub>2</sub> (2.50 g, 1.01 mmol) and DABCO (1.25 g, 1.14 mmol) was dissolved in DMF (2.5 mL) and stirred for 30 min at rt, then to it methyl acrylate (875  $\mu$ L, 9.72 mmol) was added and stirred for additional 30 min. Reaction was quenched by adding water to it, the reaction mass was added to the pentane (50 mL) with good stirring and to this saturated aqueous solution of sodium thiosulfate (30 mL) was added. The pentane layer was separated; the remaining aqueous layer was

extracted by additional pentane. Combined organic layer was dried over anhydrous  $\text{MgSO}_4$ , filtered, and concentrated to give crude iodoacrylate which was used for next reaction without further purification.

To a THF (6 mL) solution of the ligand **12** (758 mg, 2.20 mmol) added anhydrous  $\text{CrCl}_2$  (266 mg, 2.20 mmol), anhydrous  $\text{NiCl}_2$  (140 mg, 1.1 mmol) inside the glove box and the resulting mixture was stirred for 1 h. To this solution successively added a THF (2 mL) solution of the aldehyde **7** (270 mg, 1.0 mmol) and iodoacrylate (422 mg, 2 mmol) in THF (2 mL) and the mixture left for stirring at room temperature for 3 h at which time TLC indicated complete consumption of the starting material. Saturated bicarbonate solution was added and the solution further stirred for 30 min and then mixture was filtered to get rid of all the solid materials. The filtrate was diluted with EtOAc (15 mL) and the organic phase was washed with brine ( $3 \times 10$  mL) followed by drying ( $\text{MgSO}_4$ ) and concentration under reduced pressure to give a crude residue. The residue was purified by column chromatography [ $\text{SiO}_2$ , ethyl acetate-hexanes (1:5)] to furnish **8** (300 mg, 0.84 mmol, 84%) as oil.  $[\alpha]_D^{24.2} +13.4$  ( $c$  0.25,  $\text{CHCl}_3$ ).  $^1\text{H NMR}$  (400 MHz,  $\text{CDCl}_3$ )  $\delta$  6.30 (s, 1H), 5.94 (m, 2H), 5.32 (d,  $J = 17.2$  Hz, 1H), 5.22 (d,  $J = 10.2$  Hz, 1H), 4.78 (m, 1H), 4.66 (s, 2H), 4.58 (dd,  $J = 7.0$  and 6.4 Hz, 1H), 4.15 (dd,  $J = 8.4$  and 5.9 Hz, 1H), 3.92 (dd,  $J = 8.3$  and 4.0 Hz, 1H), 3.76 (s, 3H, merged with a multiplet, 1H), 3.37 (s, 3H), 3.33 (s, 3H), 1.52 (m, 10H).  $^{13}\text{C NMR}$  (100.6 MHz,  $\text{CDCl}_3$ )  $\delta$  167.1, 138.8, 135.0, 126.3, 117.9, 109.4, 98.5, 80.7, 78.9, 76.2, 71.4, 56.4, 51.8, 37.9, 34.7, 25.1, 23.9, 23.8. IR (neat)  $\nu_{\text{max}}$  2931, 2854, 1723, 1439, 1365, 1241, 1149, 1131, 1110, 1085, 1033, 937  $\text{cm}^{-1}$ . MS-EI ( $m/z$ ) 356 ( $\text{M}^+$ , 2), 294 (39), 251 (72), 209 (40), 185 (46), 179 (50), 167 (86), 157 (60). HRMS-EI ( $m/z$ ) [ $\text{M}$ ] $^+$  calcd. for  $\text{C}_{18}\text{H}_{28}\text{O}_7$  356.1835, found 356.1833.

**(3aS,4R,5R,7aS)-methyl-5-hydroxy-4-(methoxymethoxy)-3a,4,5,7a-tetrahydrospiro[benzo[*d*][1,3]dioxole-2,1'-cyclohexane]-6-carboxylate **14****

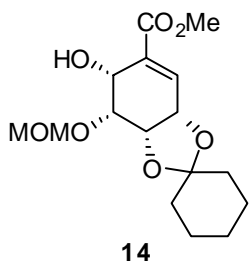

To a solution of Compound **8** (50 mg, 0.14 mmol) in degassed toluene (60 mL) added a Hoveyda-Grubbs (II) catalyst (6.3 mg, 10.2  $\mu\text{mol}$ ) and the resulting solution was refluxed for 18 h. The solvent were evaporated under reduced pressure and the residue was purified by column chromatography [ $\text{SiO}_2$ , ethyl acetate-

hexanes (1:5)] to furnish **14** (38 mg, 0.12 mmol, 86%) as a thick gum.  $[\alpha]_D^{24.2} -34.9$  (*c* 0.2, CHCl<sub>3</sub>). <sup>1</sup>H NMR (400 MHz, CDCl<sub>3</sub>)  $\delta$  6.79 (d, *J* = 2.6 Hz, 1H), 4.97 (d, *J* = 7.0 Hz, 1H), 4.83 (d, *J* = 7.0 Hz, 1H), 4.75 (m, 2H), 4.65 (b, *J* = 5.4 Hz, 1H), 3.81 (s, 3H), 3.80 (m, 1H), 3.52 (d, *J* = 10.2 Hz, 1H), 3.46 (s, 3H), 1.61 (m, 8H), 1.37 (m, 2H). <sup>13</sup>C NMR (100.6 MHz, CDCl<sub>3</sub>)  $\delta$  166.0, 135.9, 131.8, 112.1, 95.9, 75.5, 73.0, 71.2, 63.3, 55.9, 52.4, 37.6, 35.7, 24.8, 23.8, 23.6. IR (neat)  $\nu_{\max}$  3521, 2934, 2858, 1723, 1439, 1367, 1303, 1247, 1146, 1107, 1082, 1056, 1032, 935 cm<sup>-1</sup>. MS-EI (*m/z*) 328 (M<sup>+</sup>, 2), 285 (16), 152 (4), 137 (5), 99 (4), 84 (10). HRMS-EI (*m/z*) [M]<sup>+</sup> calcd. for C<sub>16</sub>H<sub>24</sub>O<sub>7</sub> 328.1522, found 328.1529.

**(3a*R*,4*R*,5*R*,7a*S*)-methyl**

**4,5-dihydroxy-3a,4,5,7a-**

**tetrahydrospiro[benzo[*d*][1,3]dioxole-2,1'-cyclohexane]-6-carboxylate **10****

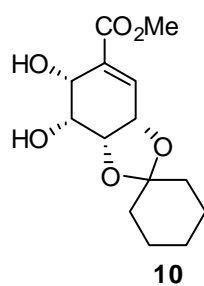

A mixture of MOM ether **14** (150 mg, 0.45 mmol) and zirconocene dichloride (133 mg, 0.45 mmol) in dry isopropanol (20 mL) was heated at reflux. After the completion of reaction (TLC analysis), it was cooled to room temperature, the reaction mixture was filtered through short celite pad and concentrated under reduced pressure.

The residue was treated with EtOAc (10 mL). The organic layer was washed with water (10 mL), brine (10 mL), dried over anhydrous Na<sub>2</sub>SO<sub>4</sub> and evaporated under reduced pressure to give product. The crude product was purified by PTLC (50% ethyl acetate-hexanes) with three times elution afforded diol **10** (108 mg, 0.38 mmol, 83%) as a colorless gum.  $[\alpha]_D^{24.1} -10.2$  (*c* 0.25, CH<sub>2</sub>Cl<sub>2</sub>). <sup>1</sup>H NMR (400 MHz, CDCl<sub>3</sub>)  $\delta$  6.81 (d, *J* = 2.9 Hz, 1H), 4.71 (m, 1H), 4.59 (m, 2H), 3.82 (s, 3H merged with a multiplet, 1H), 3.21 (d, *J* = 9.8 Hz, 1H), 3.10 (d, *J* = 11.4 Hz, 1H), 1.59 (m, 8H), 1.24 (m, 2H). <sup>13</sup>C NMR (100.6 MHz, CDCl<sub>3</sub>)  $\delta$  165.9, 136.8, 131.3, 111.9, 72.6, 67.1, 65.3, 52.4, 37.7, 35.4, 29.7, 24.7, 23.8, 23.5. IR (neat)  $\nu_{\max}$  3467, 2923, 2851, 1720, 1437, 1245, 1113, 1031, 935 cm<sup>-1</sup>. MS-EI (*m/z*) 284 (M<sup>+</sup>, 19), 255 (21), 241 (100), 137 (41), 109 (31), 55 (41). HRMS-EI (*m/z*) [M]<sup>+</sup> calcd. for C<sub>14</sub>H<sub>20</sub>O<sub>6</sub>, 284.1260, found 284.1258.

### (3*S*,4*S*,5*S*,6*S*)-methyl 6-chloro-3,4,5-trihydroxycyclohex-1-enecarboxylate **1**

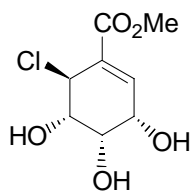

1-Chlorocarbonyl-1-methylethyl acetate (8.80  $\mu$ L, 0.06 mmol) was added dropwise at 0 °C, under a nitrogen atmosphere, to a solution of diol **10** (11.70 mg, 0.04 mmol) in dry MeCN (5 mL). The mixture **1: (+) Pericosine A** was stirred for 15 min at 0 °C and then at room temperature for further 2 h. The solvent was removed under reduced pressure, the residue extracted with EtOAc, washed once with 3% aqueous NaHCO<sub>3</sub>, dried over Na<sub>2</sub>SO<sub>4</sub>, and concentrated to give the crude chloroacetate. The crude product was used for next reaction without further purification.

A solution of chloroacetate in dry MeOH (5 mL) was treated with two drops of acetyl chloride and the mixture stirred at room temperature for 12 h. The solvent was removed under reduced pressure and the residue purified by PTLC (75% ethyl acetate-hexanes) to give pericosine A **1** (7.86 mg, 0.03 mmol, 86%) as an oil.  $[\alpha]_{\text{D}}^{26.5} +105.5$  (*c* 0.30, EtOH); lit.<sup>4b</sup>  $[\alpha]_{\text{D}}^{20} +94.3$  (*c* 0.26, EtOH) (synthetic); lit.<sup>4d</sup>  $[\alpha]_{\text{D}}^{20} +104$  (*c* 0.04, EtOH) (synthetic); lit.<sup>5</sup>  $[\alpha]_{\text{D}}^{20} +100$  (*c* 0.94, EtOH) (synthetic); lit.<sup>1,2a</sup>  $[\alpha]_{\text{D}} +57$  (*c* 3.16, EtOH) (natural product). <sup>1</sup>H NMR (400 MHz, Acetone-*d*<sub>6</sub>)  $\delta$  6.89 (d, *J* = 4.0 Hz, 1H), 4.88 (m, 2H), 4.36 (m, 1H), 4.18 (d, *J* = 6.0 Hz, 1H), 4.12 (d, *J* = 8.6 Hz, 2H), 4.04 (d, *J* = 3.2 Hz, 1H), 3.77 (s, 3H). <sup>13</sup>C NMR (100.6 MHz, Acetone-*d*<sub>6</sub>)  $\delta$  165.3, 141.0, 129.6, 74.8, 67.7, 66.2, 56.9, 51.5. IR (neat)  $\nu_{\text{max}}$  3390, 2923, 1717, 1437, 1264, 1094, 806 cm<sup>-1</sup>. MS-EI (*m/z*) 222 (M<sup>+</sup>, 0.07), 157 (34), 131 (63), 109 (50), 95 (87), 53 (100). HRMS-EI (*m/z*) [M]<sup>+</sup> calcd. for C<sub>8</sub>H<sub>11</sub>ClO<sub>5</sub>, 222.0295, found 222.0293.

### Synthesis of Pericosine B

#### (3*R*,4*R*)-methyl 3-methoxy-4-(methoxymethoxy)-2-methylene-4-((2*S*,3*S*)-3-vinyl-1,4-dioxaspiro[4.5]decan-2-yl)butanoate **13**

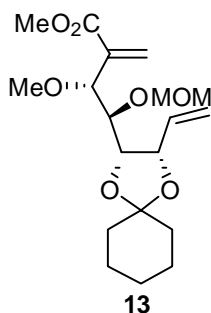

To a solution of compound **8** (90 mg, 0.25 mmol) in dry ether (10 mL) added a MeI (0.5 mL, excess) and KOH (10 mg) and the resulting mixture was refluxed for 2 h. All the solid materials were removed by filtration over celite and the filtrate was concentrated to afford a crude residue. The residue was purified by column chromatography [SiO<sub>2</sub>,

ethyl acetate-hexanes (1:9)] to furnish **13** (70mg, 0.19 mmol, 76%) as a thick gum.  $[\alpha]_D^{24.0} -8.4$  (*c* 0.25, CHCl<sub>3</sub>). <sup>1</sup>H NMR (400 MHz, CDCl<sub>3</sub>)  $\delta$  6.39 (s, 1H), 5.99 (m, 1H), 5.92 (s, 1H), 5.30 (d, *J* = 17.2 Hz, 1H), 5.20 (d, *J* = 10.7 Hz, 1H), 4.74 (d, *J* = 6.3 Hz, 1H), 4.67 (d, *J* = 6.3 Hz, 1H), 4.58 (t, *J* = 6.6 Hz, 1H), 4.47 (d, *J* = 3.6 Hz, 1H), 4.25 (dd, *J* = 7.2 and 6.2 Hz, 1H), 3.92 (dd, *J* = 7.5 and 3.7 Hz, 1H), 3.76 (s, 3H), 3.36 (s, 3H), 3.33 (s, 3H), 1.46 (m, 10H). <sup>13</sup>C NMR (100.6 MHz, CDCl<sub>3</sub>)  $\delta$  166.9, 137.1, 135.5, 127.2, 117.3, 109.0, 97.9, 80.6, 78.9, 77.9, 75.9, 57.6, 56.3, 51.8, 37.9, 34.7, 25.2, 24.0, 23.8. IR (neat)  $\nu_{\max}$  2931, 2854, 1723, 1439, 1365, 1241, 1149, 1131, 1110, 1085, 1033, 937 cm<sup>-1</sup>. MS-EI (*m/z*) 370 (M<sup>+</sup>, 0.5), 250 (5), 207 (12), 142 (20), 129 (100), 75 (90). HRMS-EI (*m/z*) [M]<sup>+</sup> calcd. for C<sub>19</sub>H<sub>30</sub>O<sub>7</sub>, 370.1992, found 370.1998.

**(3a*S*,4*R*,5*R*,7a*S*)-methyl**

**5-methoxy-4-(methoxymethoxy)-3a,4,5,7a-**

**tetrahydrospiro[benzo[d][1,3]dioxole-2,1'-cyclohexane]-6-carboxylate **9****

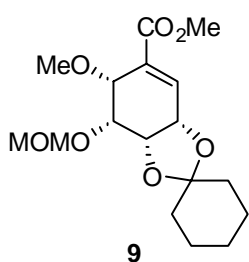

To a solution of compound **13** (38 mg, 0.102 mmol) in degassed toluene (40 mL) added a Hoveyda-Grubbs (II) catalyst (6.3 mg, 10.2  $\mu$ mol) and the resulting solution was refluxed for 18 h. The solvent were evaporated under reduced pressure and the residue was purified by column chromatography [SiO<sub>2</sub>, ethyl acetate-hexanes (1:5)] to furnish **9** (30 mg, 0.88 mmol, 86%) as a thick

gum.  $[\alpha]_D^{24.1} -18.5$  (*c* 0.28, CHCl<sub>3</sub>). <sup>1</sup>H NMR (400 MHz, CDCl<sub>3</sub>)  $\delta$  6.78 (d, *J* = 2.8 Hz, 1H), 4.85 (s, 2H), 4.64 (m, 1H), 4.56 (m, 1H), 4.35 (d, *J* = 4.1 Hz, 1H), 3.79 (s, 3H merged with a multiplet, 1H), 3.57 (s, 3H), 3.47 (s, 3H), 1.54 (m, 10 H). <sup>13</sup>C NMR (100.6 MHz, CDCl<sub>3</sub>)  $\delta$  166.5, 137.3, 130.2, 112.1, 95.1, 72.8, 72.6, 71.8, 61.0, 55.8, 52.1, 37.2, 35.7, 24.9, 23.8, 23.7. IR (neat)  $\nu_{\max}$  2931, 2854, 1723, 1439, 1365, 1241, 1149, 1131, 1110, 1085, 1033, 937 cm<sup>-1</sup>. MS-EI (*m/z*) 342 (M<sup>+</sup>, 13), 299 (48), 183 (10), 151 (20), 123 (8), 55 (12). HRMS-EI (*m/z*) [M]<sup>+</sup> calcd. for C<sub>17</sub>H<sub>26</sub>O<sub>7</sub> 342.1679, found 342.1682.



**(3*S*,4*S*,5*S*,6*R*)-methyl 3,4,5-trihydroxy-6-methoxycyclohex-1-enecarboxylate 2**

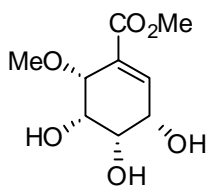

**2:(+)** Pericosine B

To a solution of compound **9** (26 mg, 0.076 mmol) in DCM (2 mL) added a mixture of TFA and water (9:1, 0.5 mL) and the resulting solution was stirred for 18 h at room temperature. The solvents were evaporated under reduced pressure and the residue was purified by preparative TLC (10% methanol-ethyl acetate,  $R_f$  0.5) to furnish (+)-pericosine B **2** as a white solid (16 mg, 73  $\mu$ mol, 96%). Mp 84–86 °C,  $[\alpha]_D^{24.1} +30.3$  ( $c$  0.41, EtOH); lit.<sup>3</sup>  $[\alpha]_D^{21} +30.6$  ( $c$  0.8, EtOH) (synthetic); lit.<sup>5</sup>  $[\alpha]_D^{20} +32.1$  ( $c$  0.88, EtOH) (synthetic); lit.<sup>4a</sup>  $[\alpha]_D^{25} -32.6$  ( $c$  0.35, EtOH) (synthetic enantiomer); lit.<sup>1,2a</sup>  $[\alpha]_D +22.3$  ( $c$  0.82, EtOH) (natural product). <sup>1</sup>H NMR (400 MHz, Acetone- $d_6$ )  $\delta$  6.71 (dd,  $J = 2.4$  and 1.1 Hz, 1H), 4.71 (b, 1H), 4.46 (m, 2H), 4.23 (d,  $J = 4.3$  Hz, 1H), 4.20 (m, 1H), 3.98 (m, 1H), 3.84 (m, 1H), 3.75 (s, 3H), 3.58 (s, 3H). <sup>13</sup>C NMR (100.6 MHz, Acetone- $d_6$ )  $\delta$  166.1, 141.2, 129.6, 75.8, 71.5, 68.9, 68.4, 60.7, 51.2. IR (neat)  $\nu_{\max}$  3415, 1680, 1438, 1256, 1205, 1133, 1067, 799  $\text{cm}^{-1}$ . MS-EI ( $m/z$ ) 219 ( $M^+ + H$ , 0.3), 171 (10), 158 (12), 139 (39), 126 (80), 97 (18), 69 (15), 41 (11), 17 (15). HRMS-EI ( $m/z$ )  $[M+H]^+$  calcd. for  $C_9H_{14}O_6$  218.0790, found 219.0867.

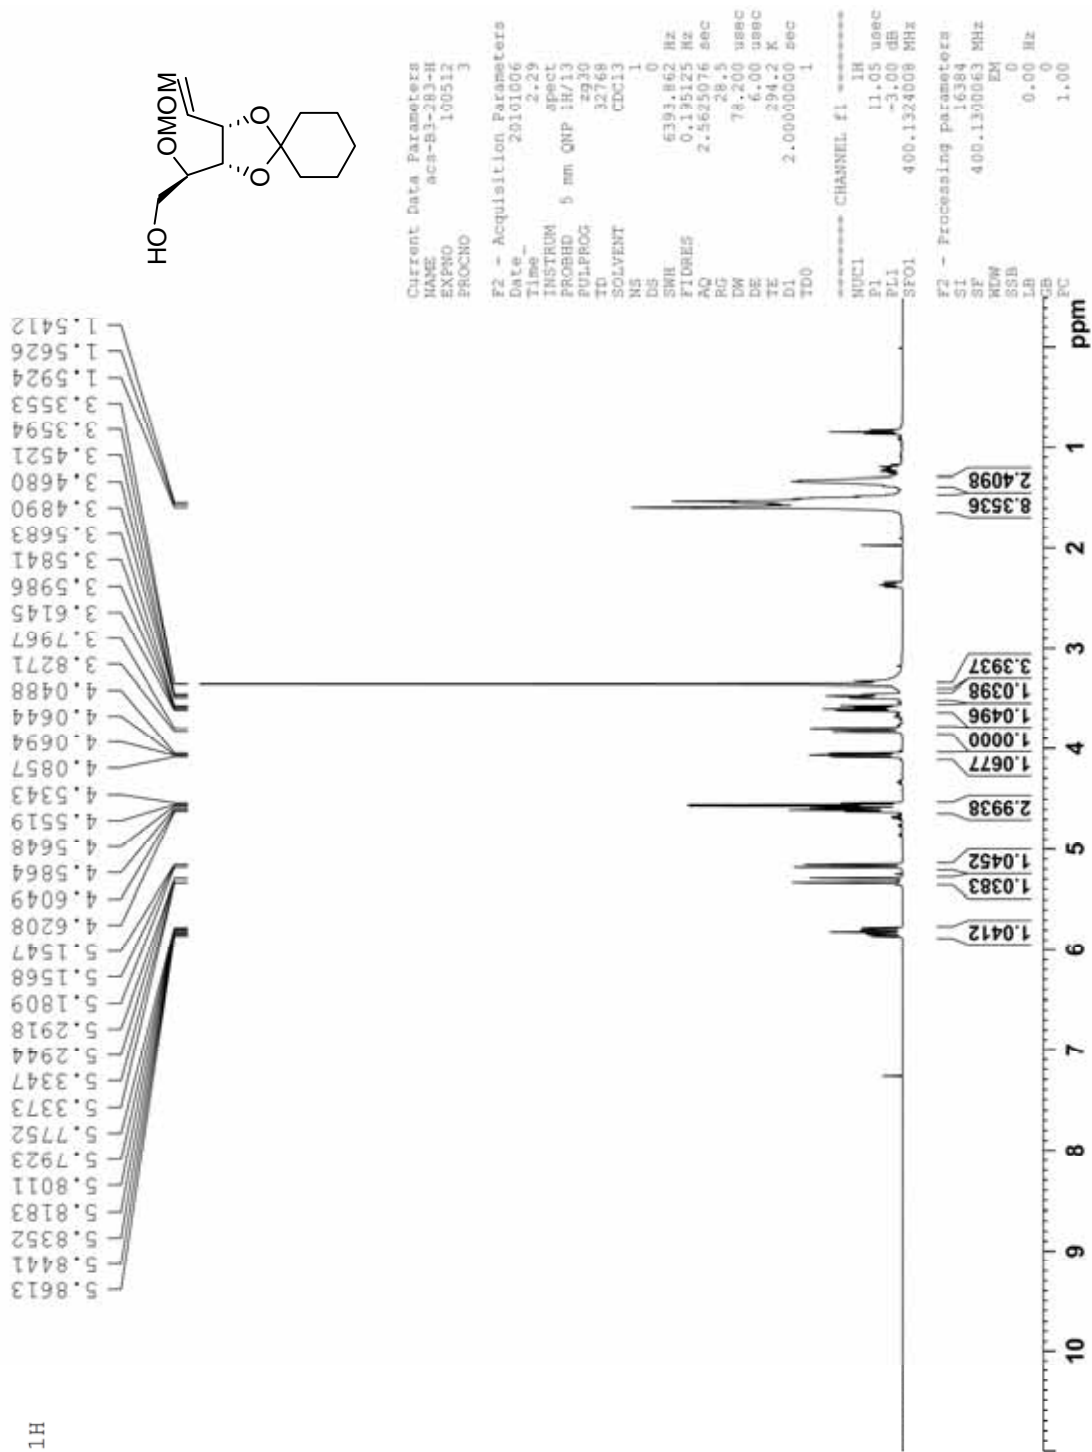

13C

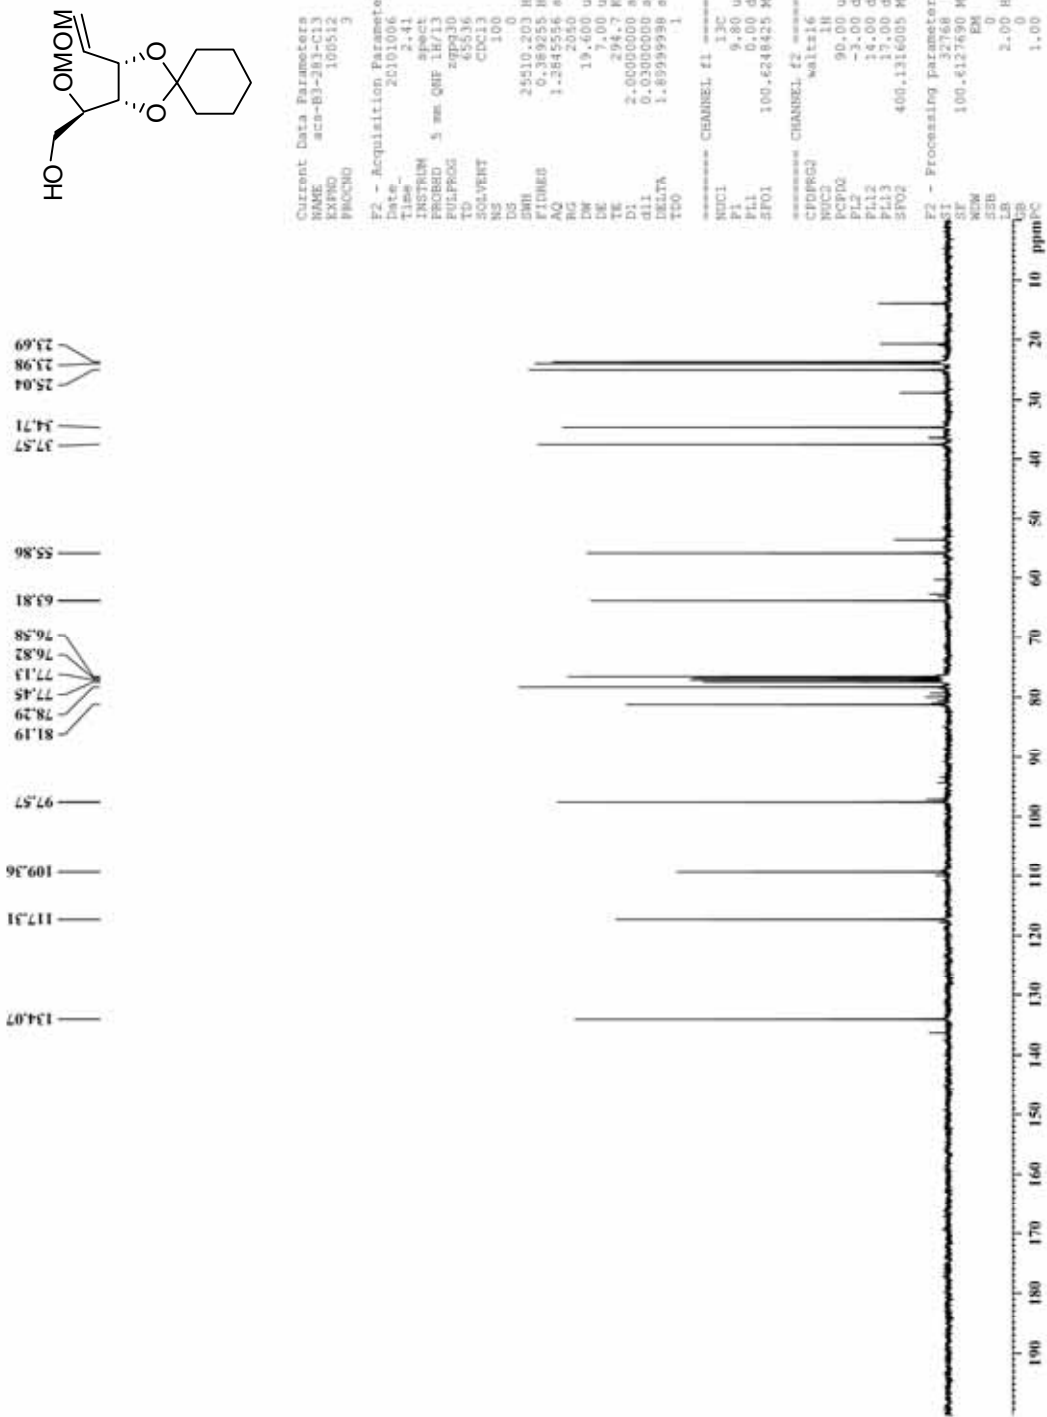

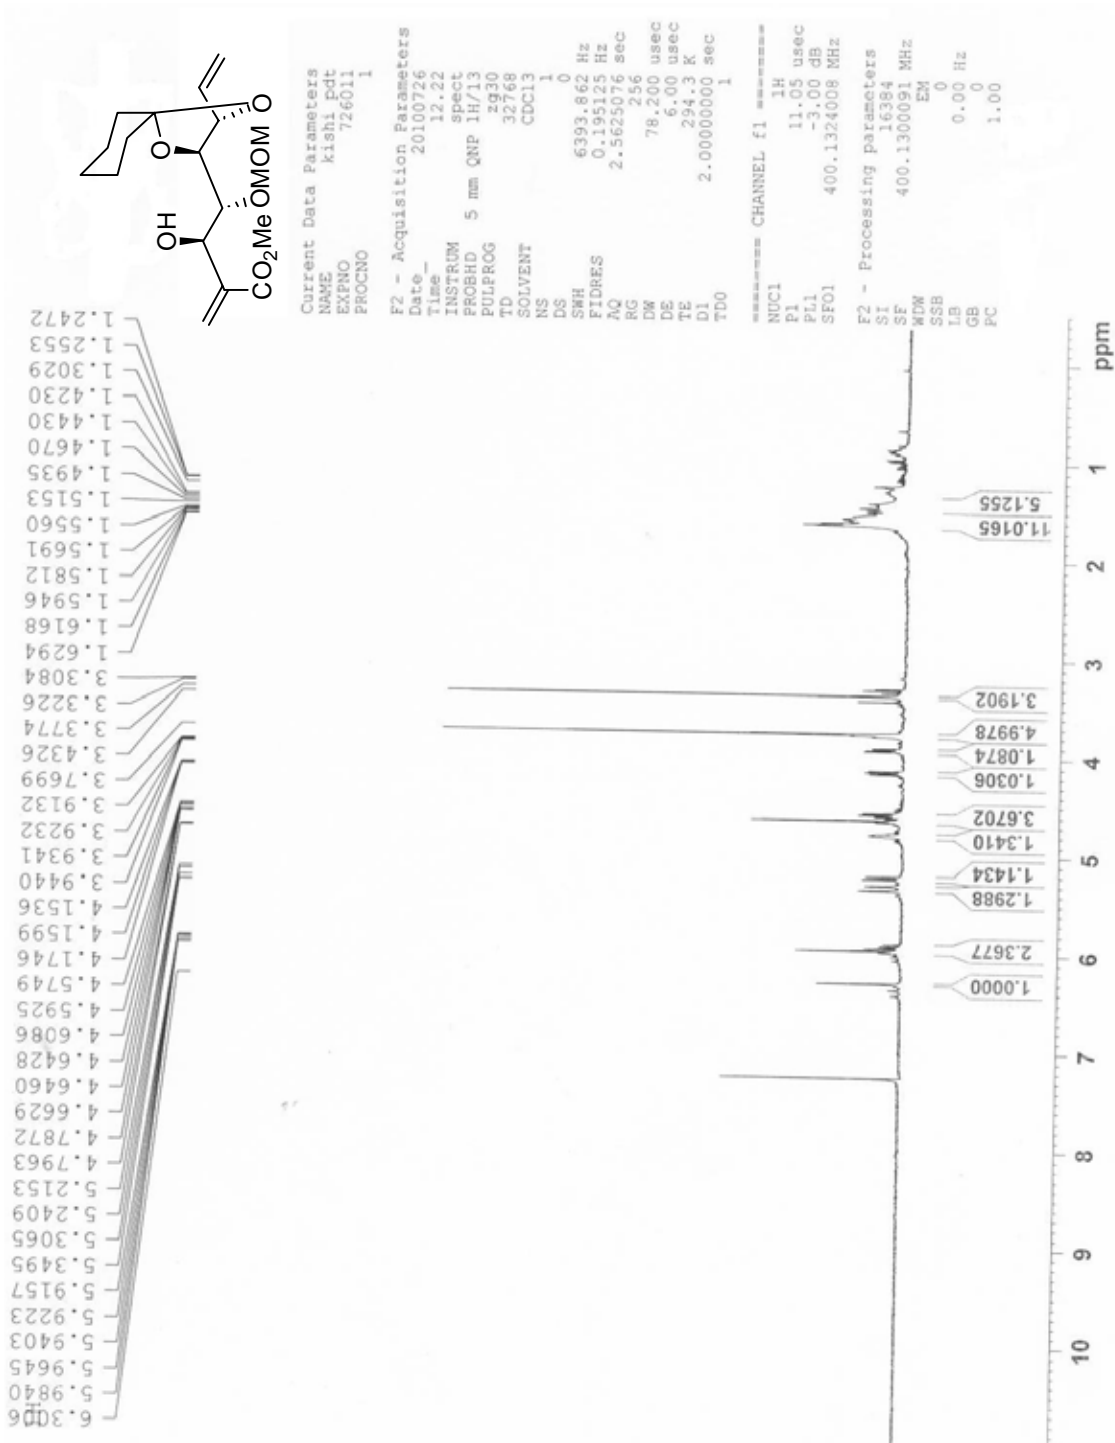

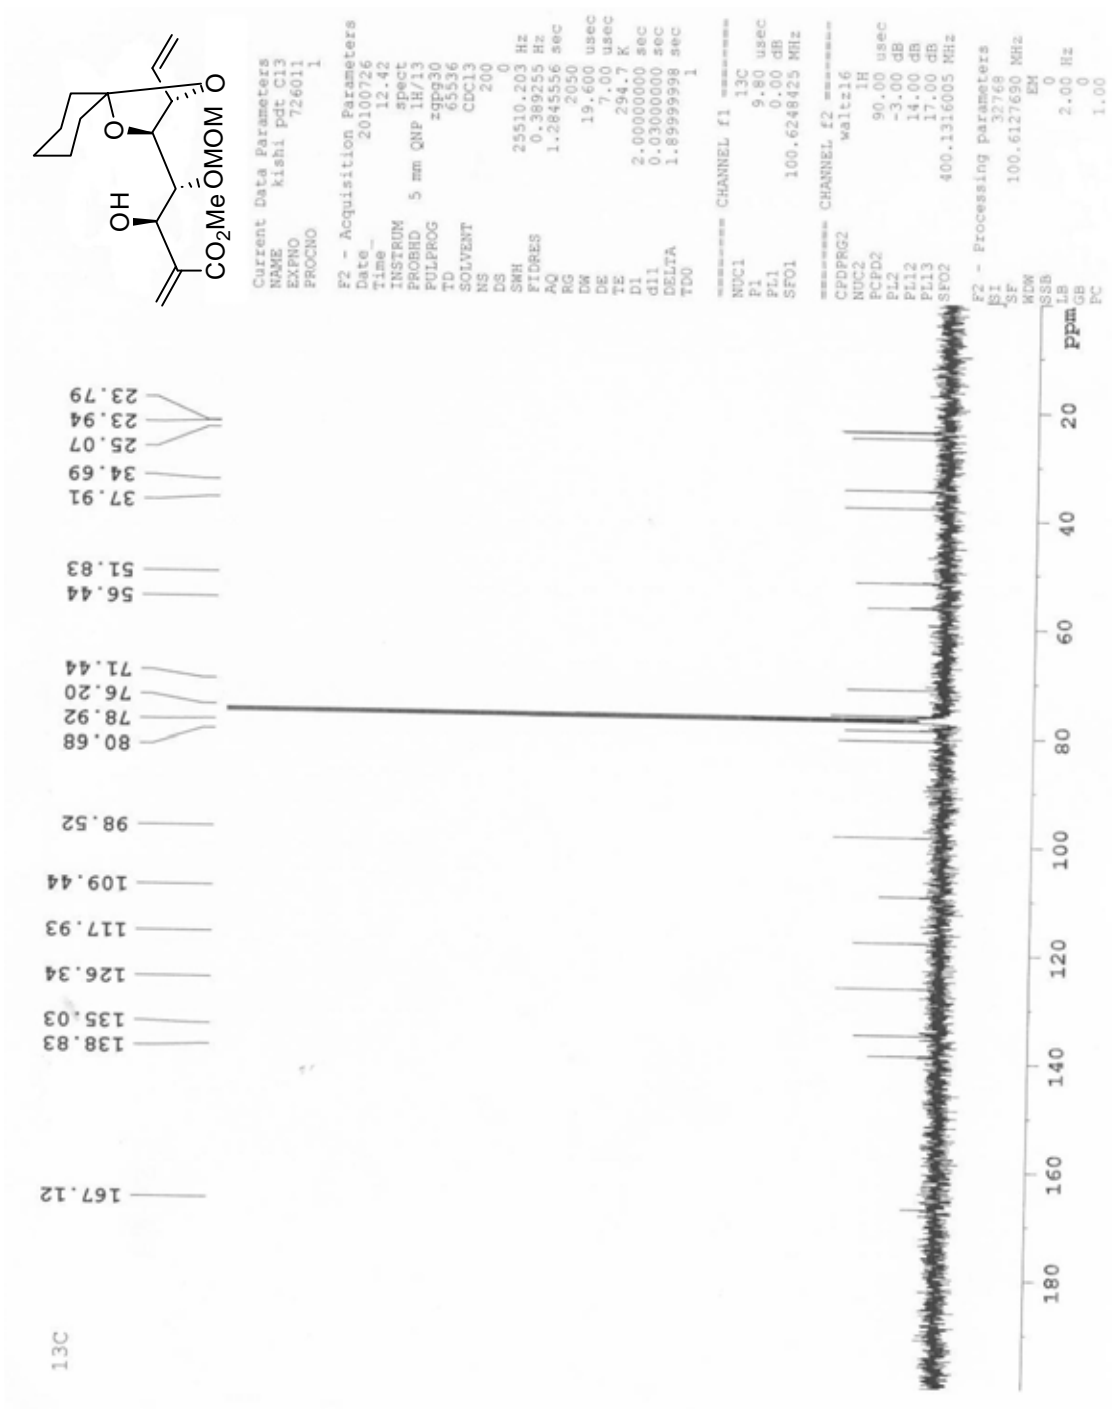

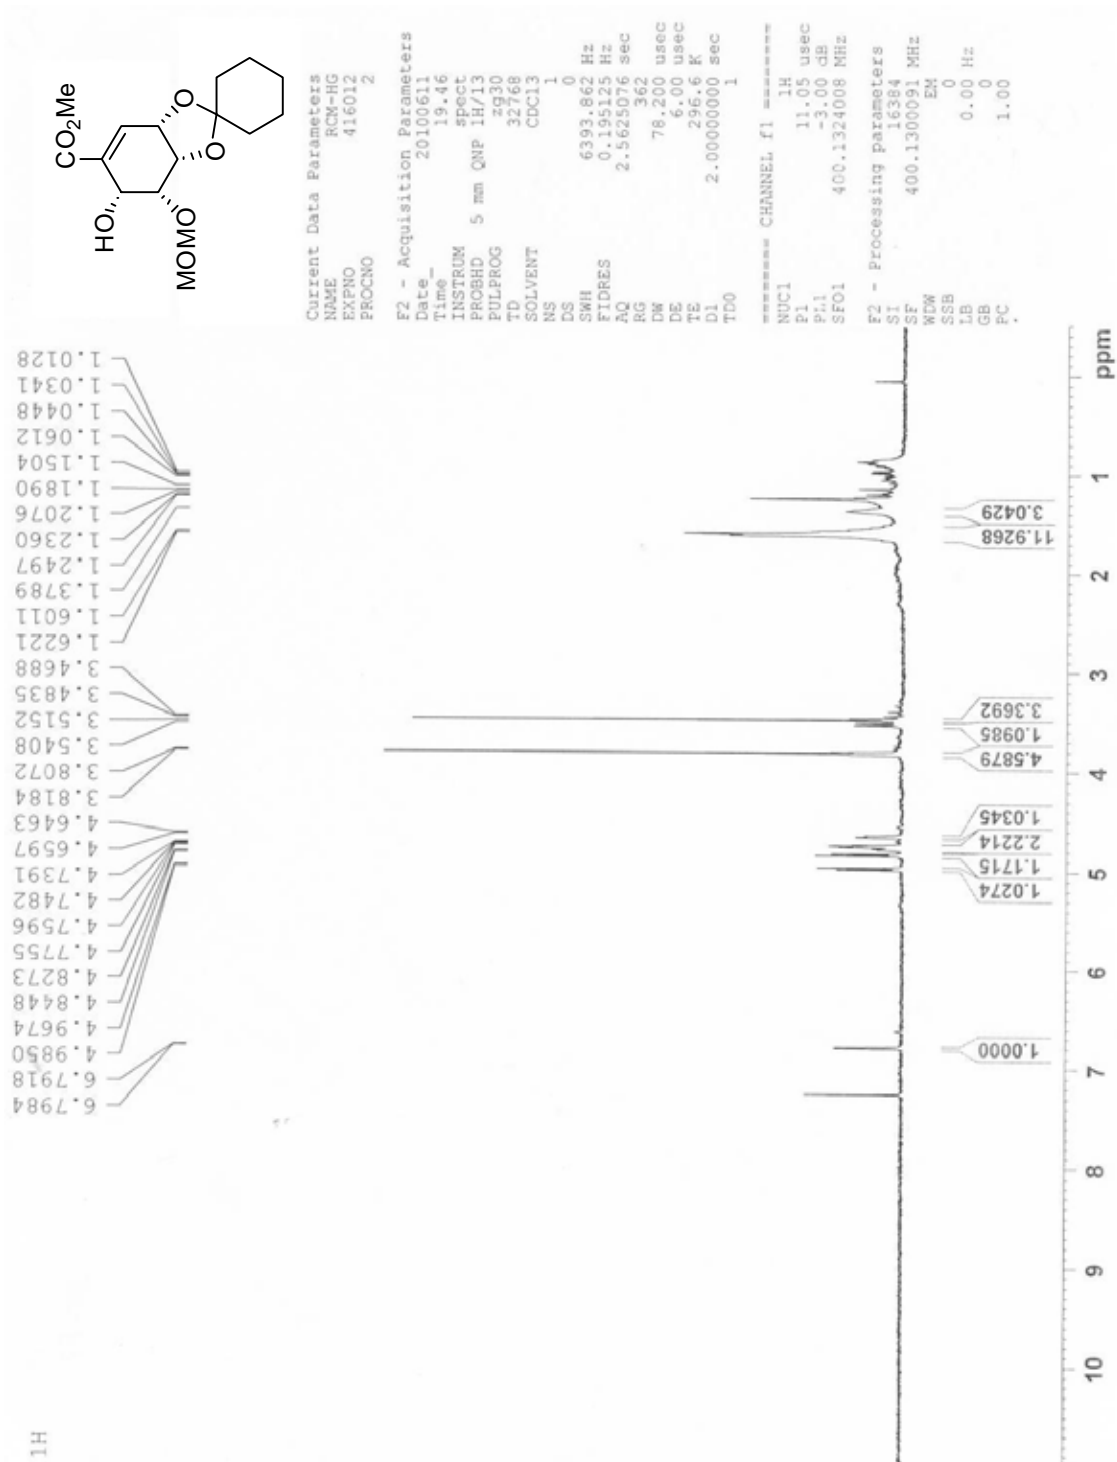

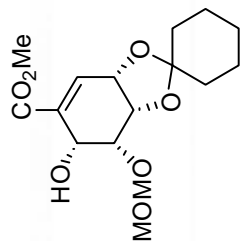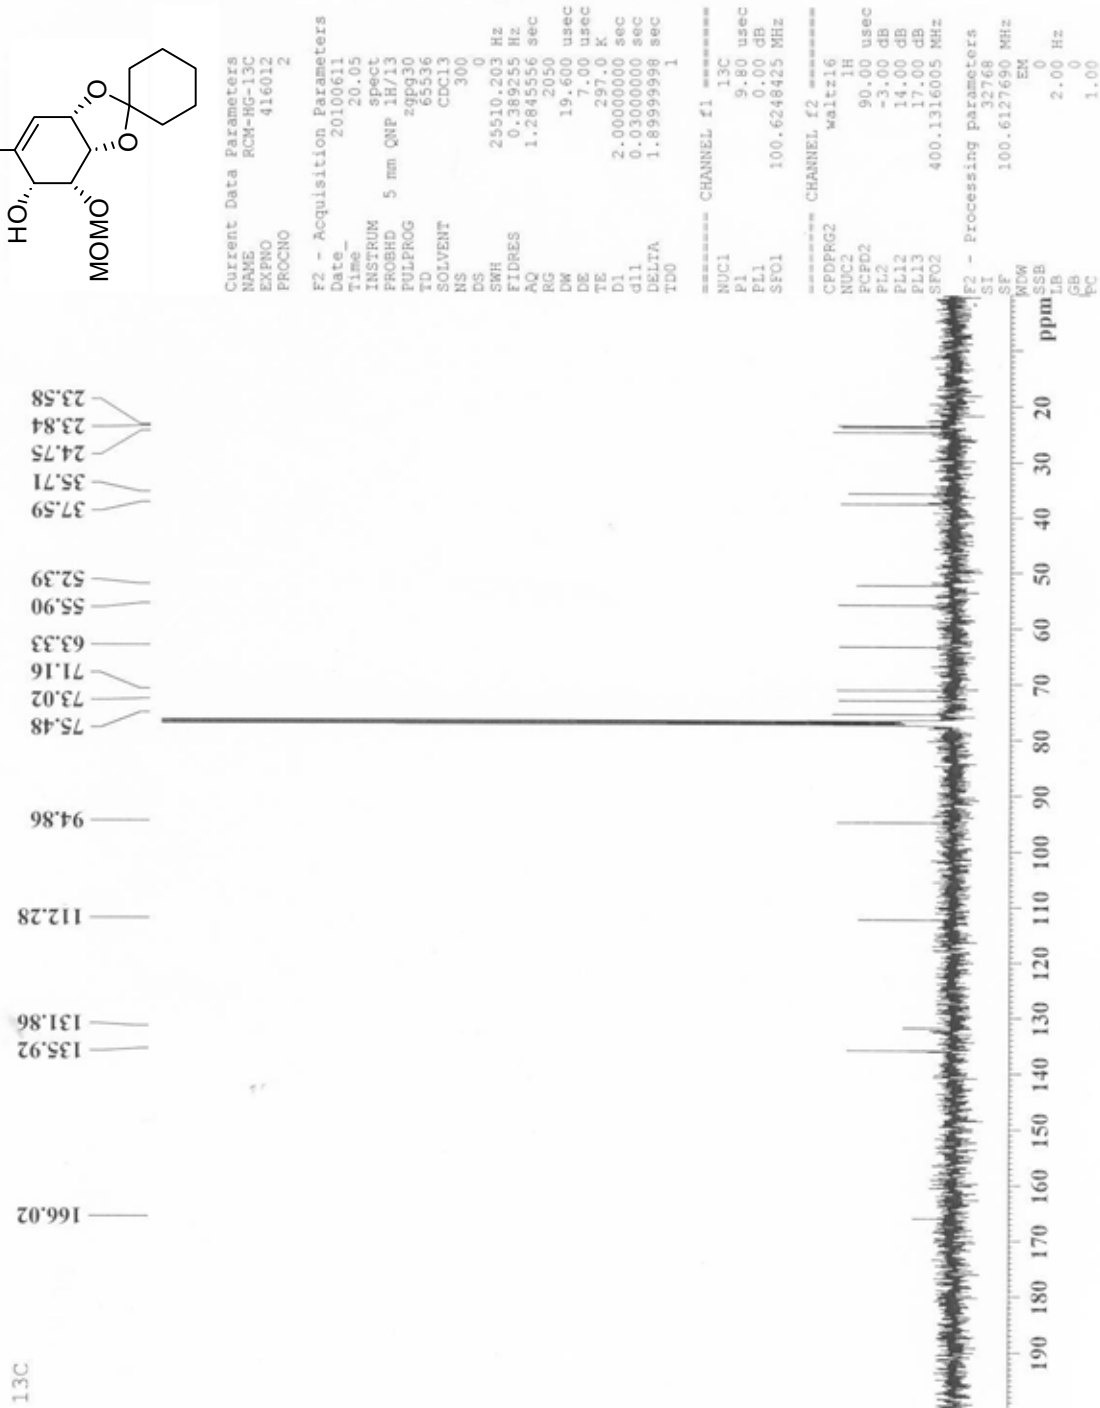

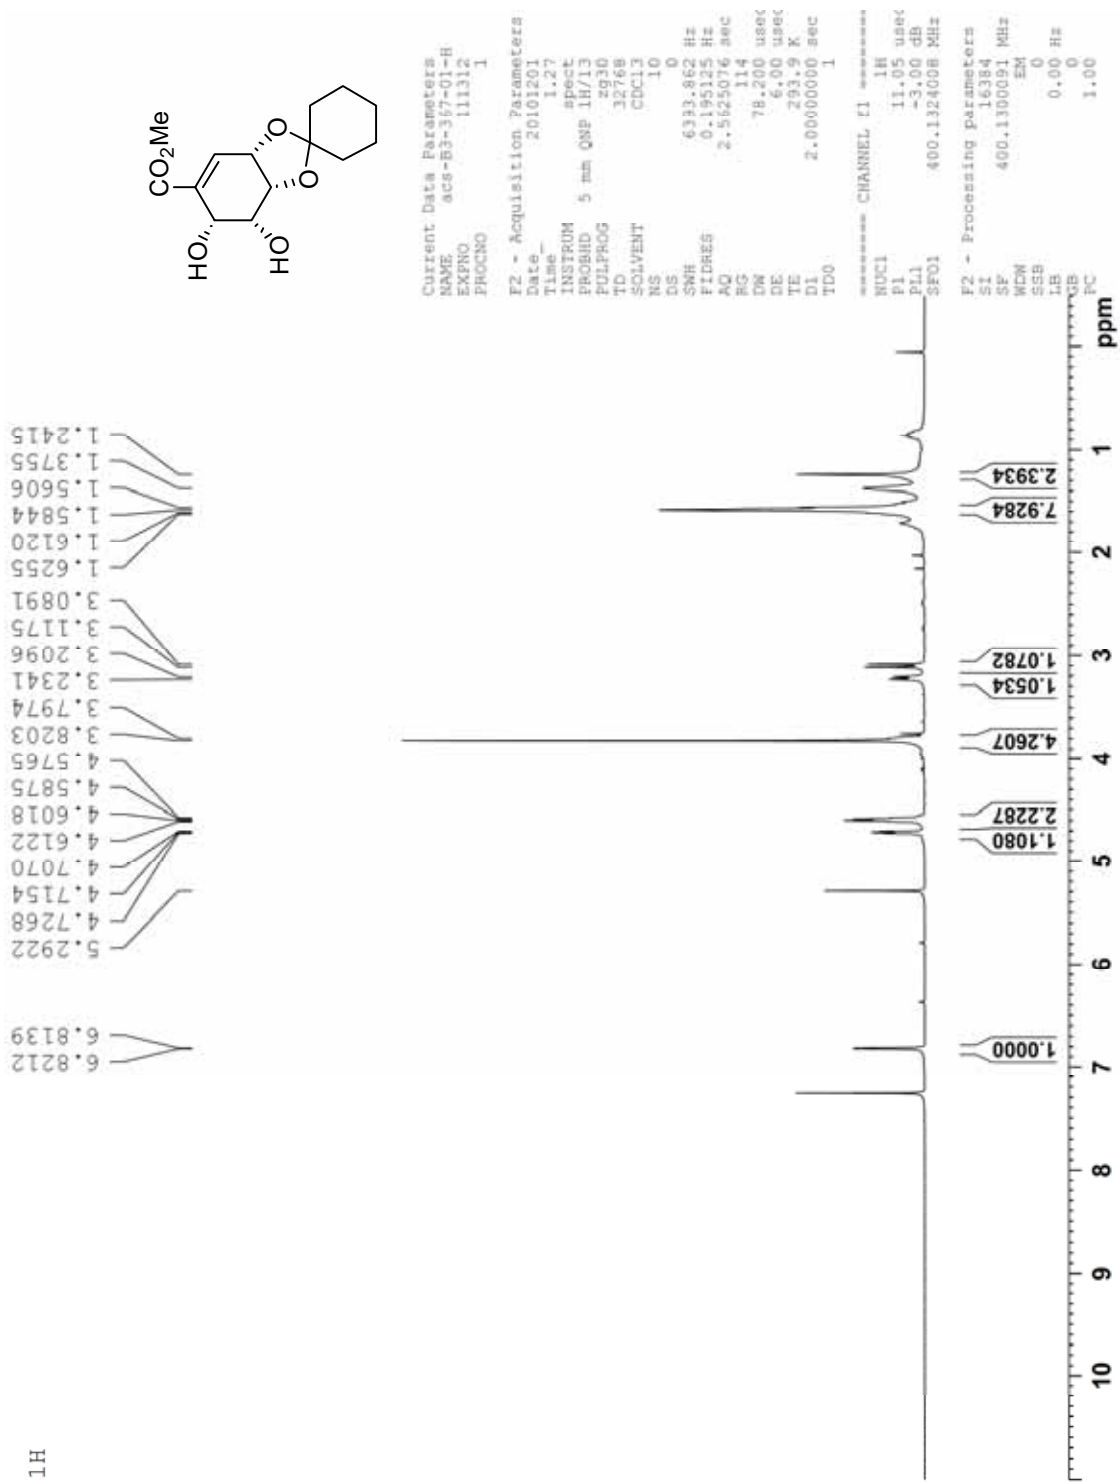



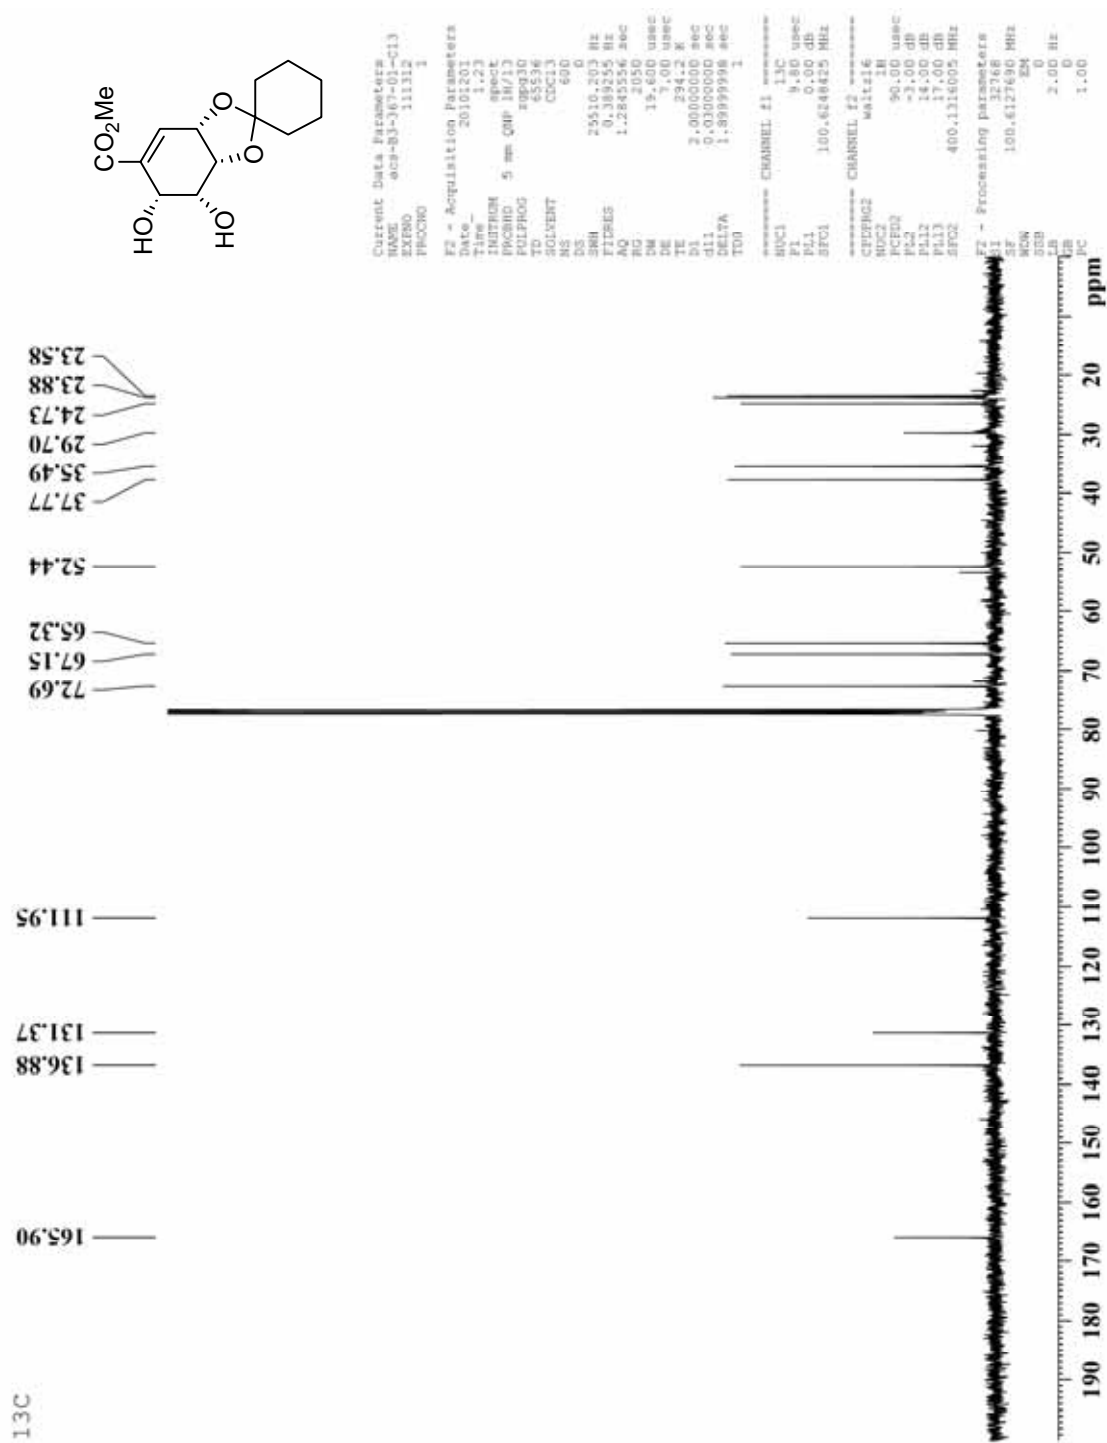

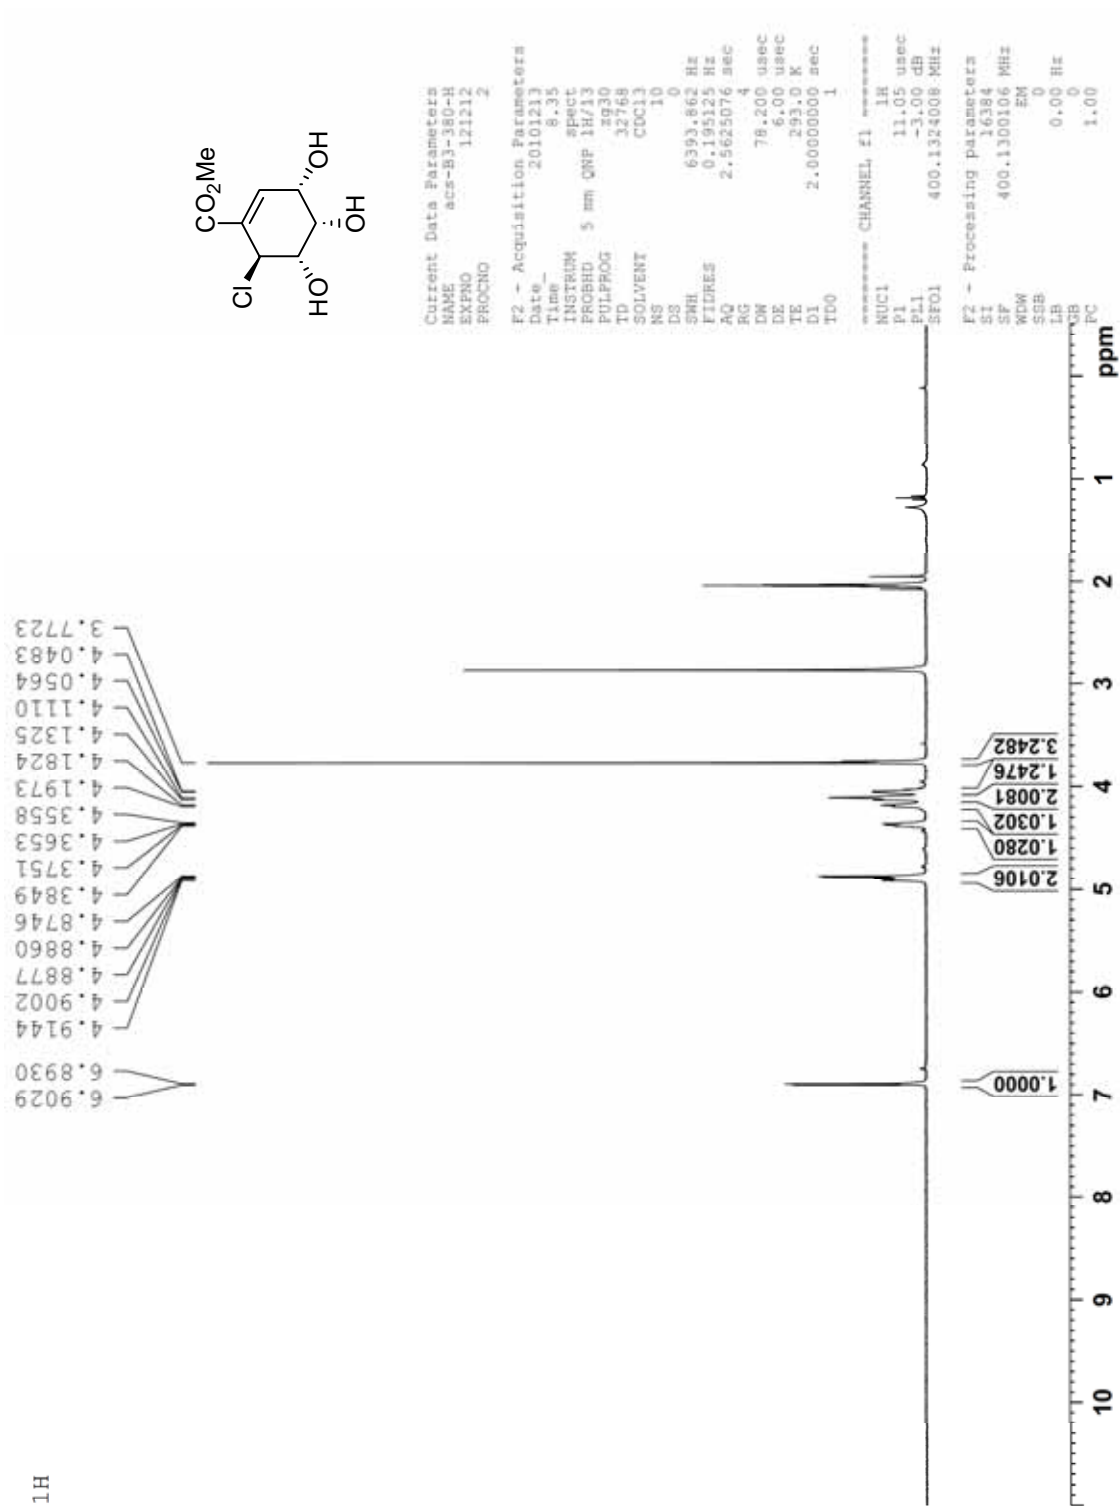

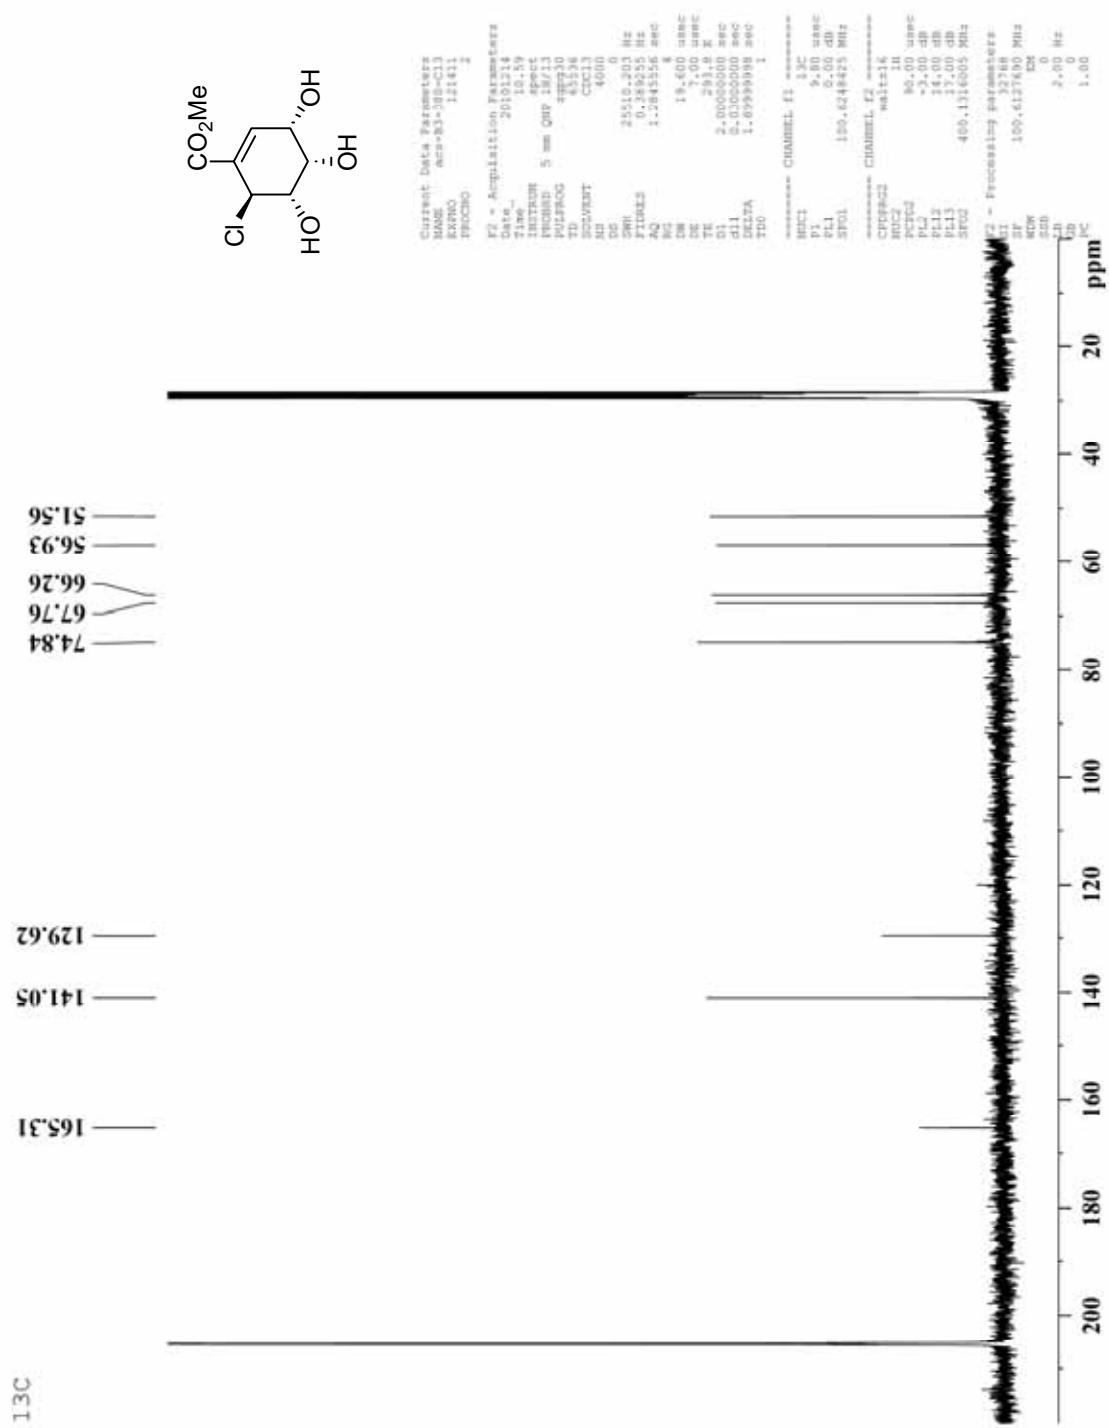

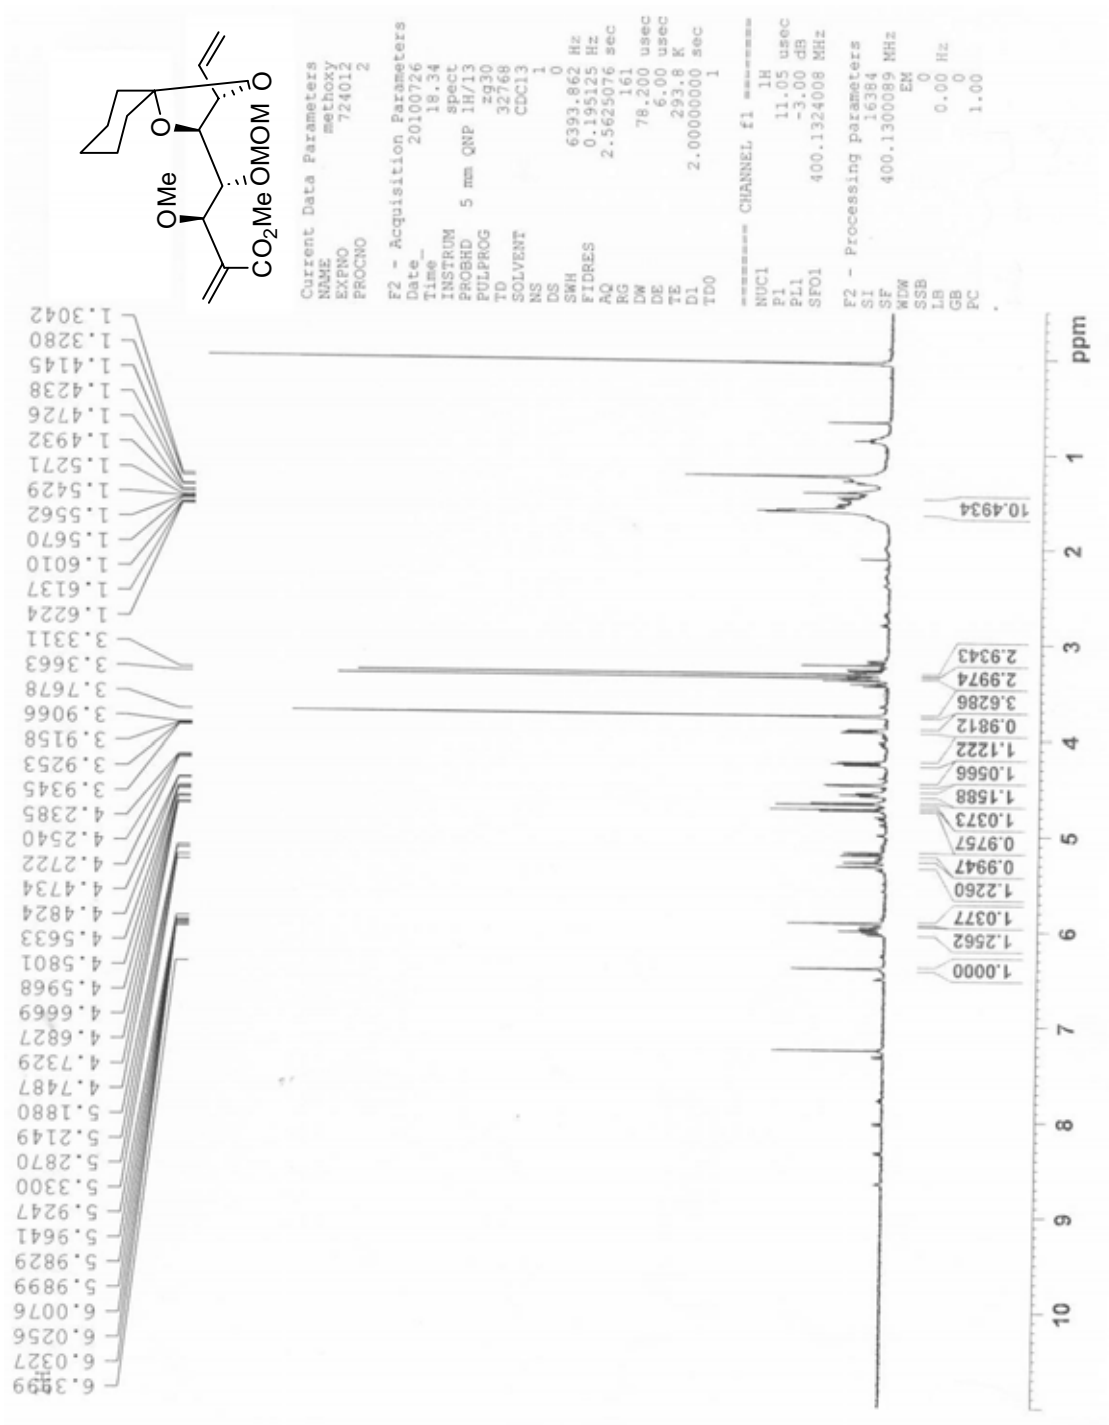

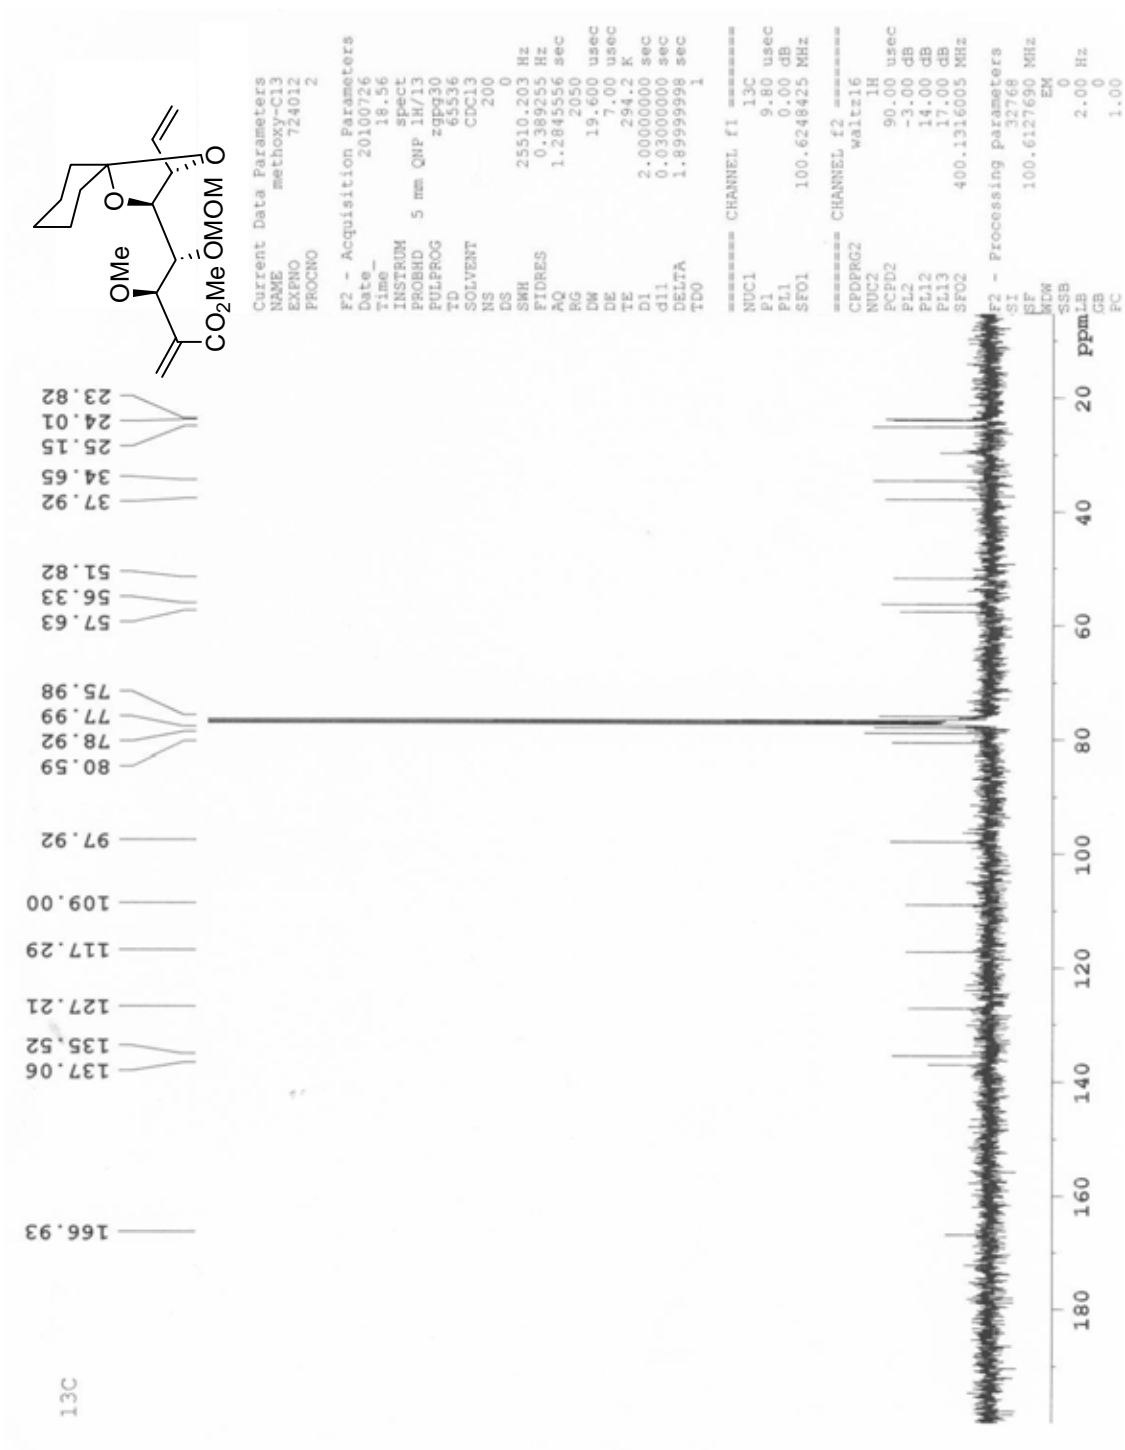

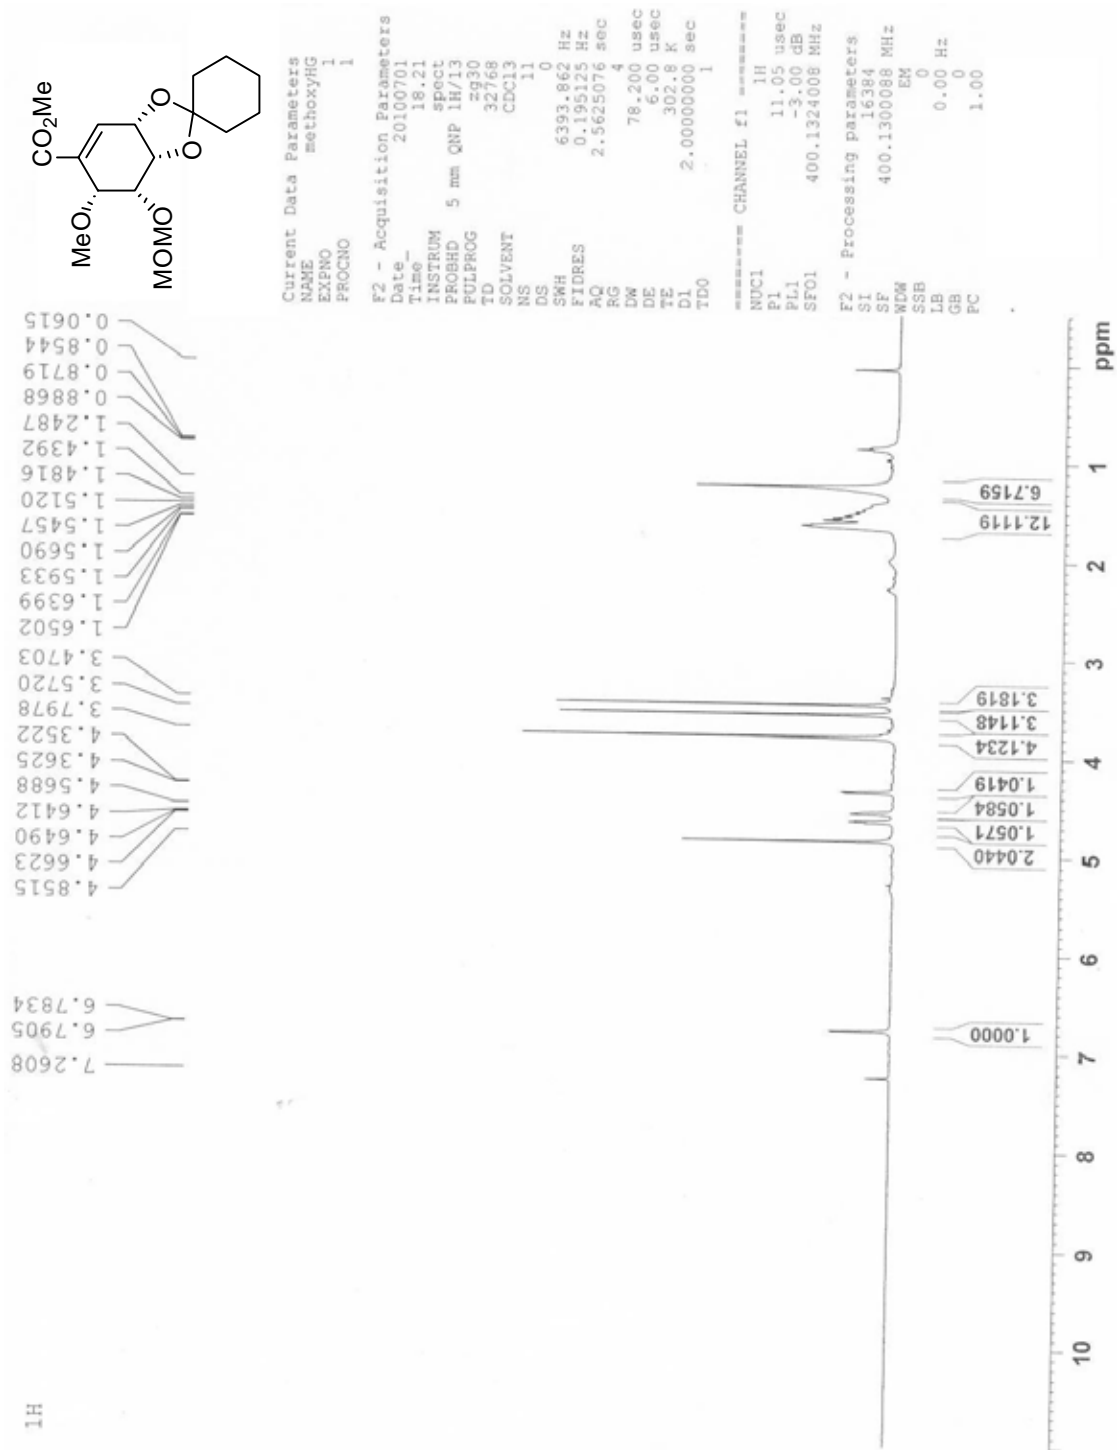

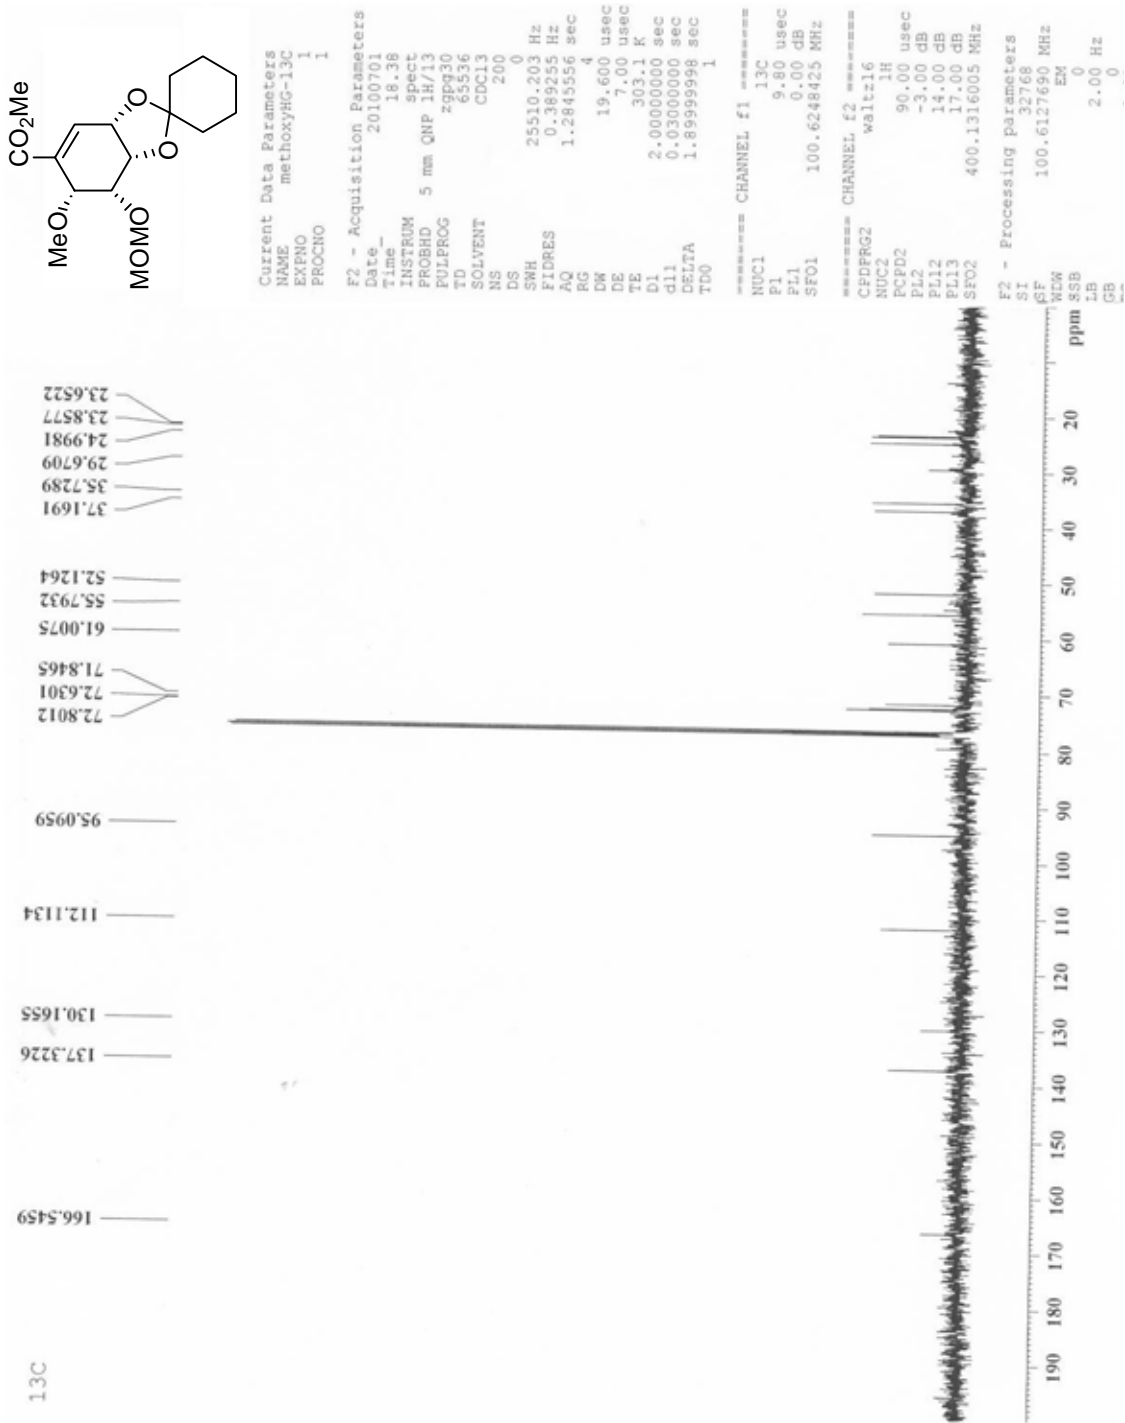

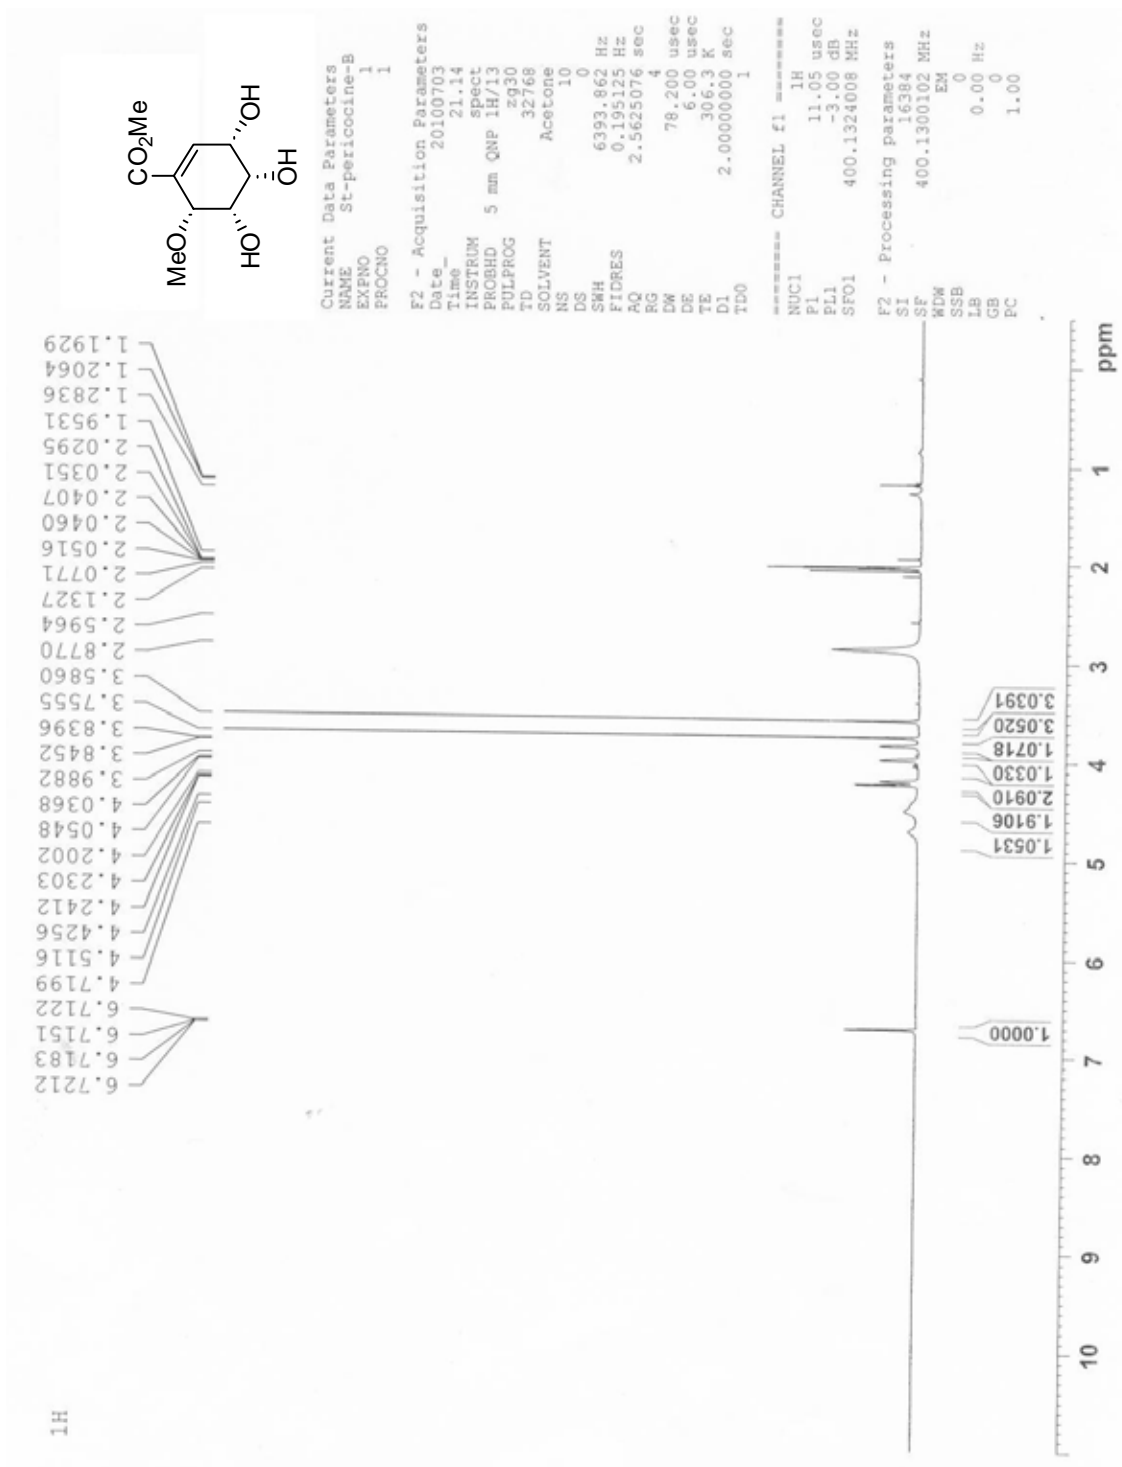



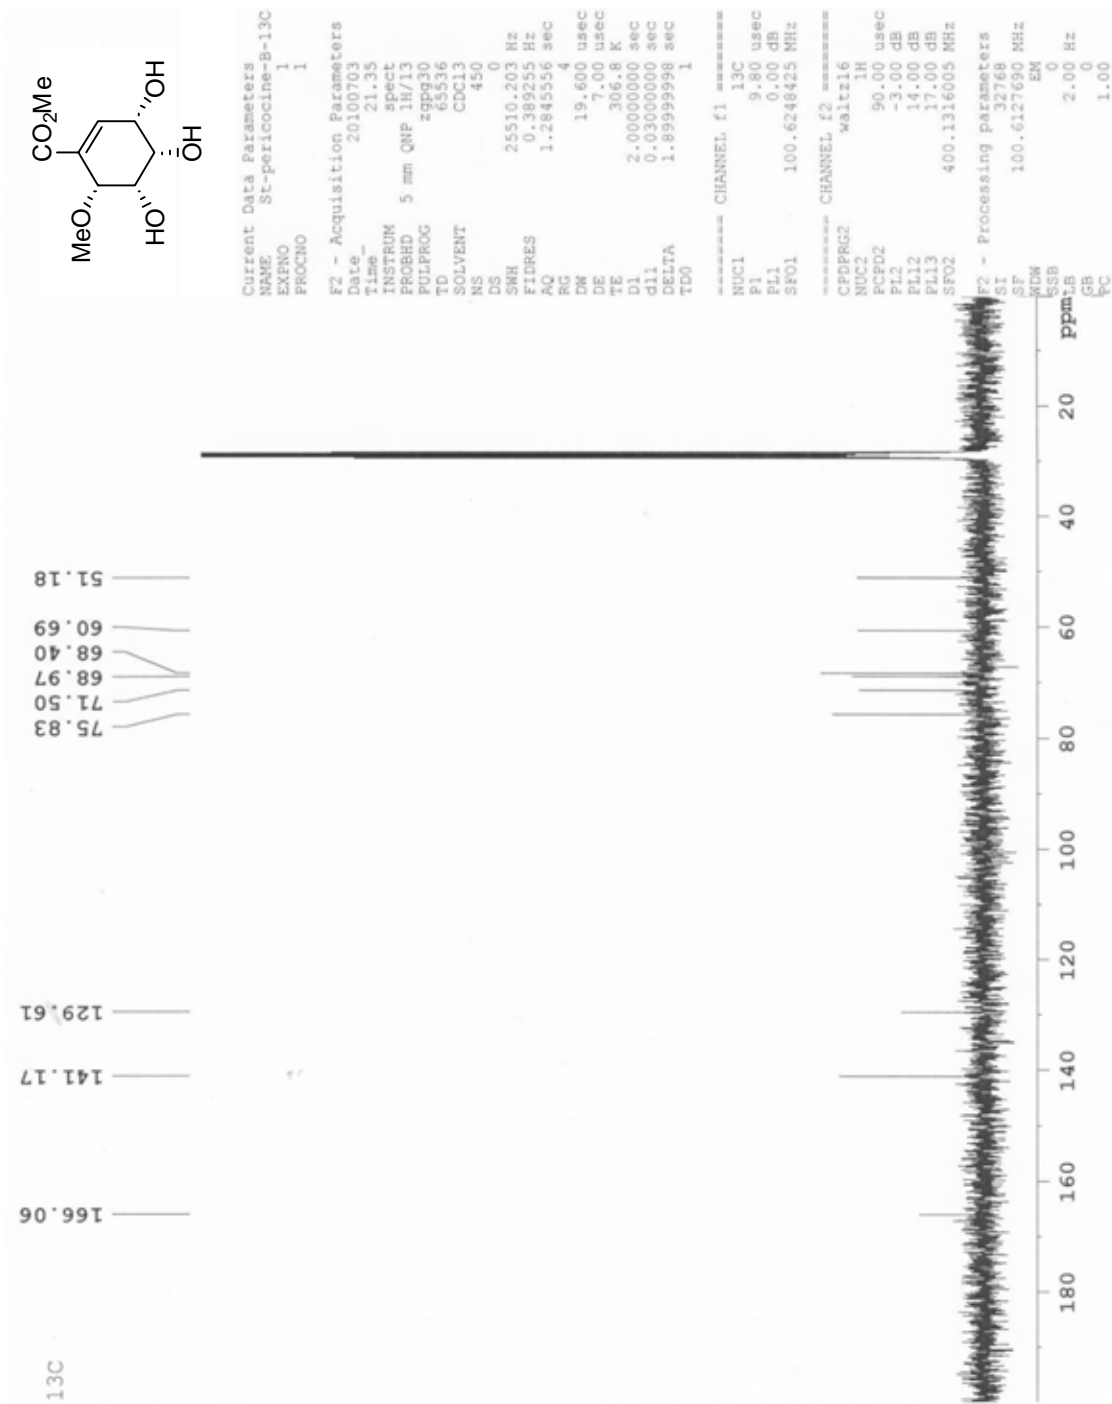

Supplement: c1ob06383a.pdf [file c1ob06383a.pdf]
